# Supplementary material for: Three-Dimensionally Printed Vaginal Rings: Perceptions of Women and Gynecologists in a Cross-Sectional Survey
Source: MDPI journal article supplement (doi:10.3390/pharmaceutics15092302), 2023-09-11
Supplement: s1 [file s1]

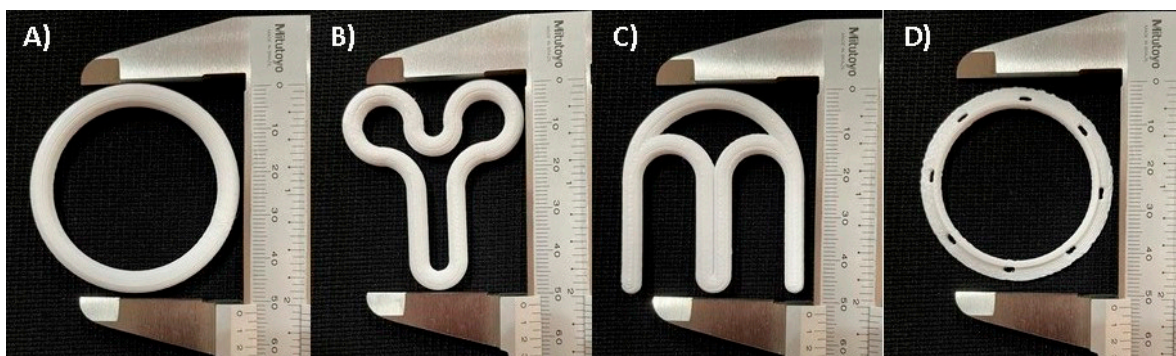

**Figure S1.** Optical images of the different VR geometries produced by FDM technology with PLA filament.
